# Supplementary material for: Increased CD14+HLA-DR-/low myeloid-derived suppressor cells can be regarded as a biomarker on disease severity and response to therapy in acute coronary syndrome
Source: PeerJ. 2024 Oct 8;12:e18154. doi: 10.7717/peerj.18154 (PMC11468897; doi:10.7717/peerj.18154)
Supplement: Supplemental Information 13 [file peerj-12-18154-s013.xls]

## Sheet: Sheet1
ITEM TO CHECK	IMPORTANCE	CHECKLIST
EXPERIMENTAL DESIGN
Definition of experimental and control groups	E	Page5,line21
Number within each group	E	Page5,line22
Assay carried out by core lab or investigator's lab?	D	NA
Acknowledgement of authors' contributions	D	NA
SAMPLE
Description	E	Page8,line10
Volume/mass of sample processed	D	NA
Microdissection or macrodissection	E	Page8,line10
Processing procedure	E	Page8,line10
If frozen - how and how quickly?	E	Page8,line10
If fixed - with what, how quickly?	E	Page8,line10
Sample storage conditions and duration (especially for FFPE samples)	E	Page8,line10
NUCLEIC ACID EXTRACTION
Procedure and/or instrumentation	E	Page8,line12
Name of kit and details of any modifications	E	Page8,line12
Source of additional reagents used	D	NA
Details of DNase or RNAse treatment	E	Page8,line12
Contamination assessment (DNA or RNA)	E	Page8,line12
Nucleic acid quantification	E	Page8,line12
Instrument and method	E	Page8,line12
Purity (A260/A280)	D	NA
Yield	D	NA
RNA integrity method/instrument	E	Page8,line19
RIN/RQI or Cq of 3' and 5' transcripts	E	Page8,line19
Electrophoresis traces	D	NA
Inhibition testing (Cq dilutions, spike or other)	E	Page8,line19
REVERSE TRANSCRIPTION
Complete reaction conditions	E	Page9,line6
Amount of RNA and reaction volume	E	Page9,line6
Priming oligonucleotide (if using GSP) and concentration	E	Page9,line6
Reverse transcriptase and concentration	E	Page9,line6
Temperature and time	E	Page9,line6
Manufacturer of reagents and catalogue numbers	D	NA
Cqs with and without RT	D*	NA
Storage conditions of cDNA	D	NA
qPCR TARGET INFORMATION
If multiplex, efficiency and LOD of each assay.	E	Page9,line6
Sequence accession number	E	Page9,line6
Location of amplicon	D	NA
Amplicon length	E	Page9,line6
In silico specificity screen (BLAST, etc)	E	Page9,line6
Pseudogenes, retropseudogenes or other homologs?	D	NA
Sequence alignment	D	NA
Secondary structure analysis of amplicon	D	NA
Location of each primer by exon or intron (if applicable)	E	Page9,line6
What splice variants are targeted?	E	Page9,line6
qPCR OLIGONUCLEOTIDES
Primer sequences	E	Page8,line20
RTPrimerDB Identification Number	D	NA
Probe sequences	D**	NA
Location and identity of any modifications	E	Page8,line20
Manufacturer of oligonucleotides	D	NA
Purification method	D	NA
qPCR PROTOCOL
Complete reaction conditions	E	Page9,line7
Reaction volume and amount of cDNA/DNA	E	Page9,line8
Primer, (probe), Mg++ and dNTP concentrations	E	Page9,line8
Polymerase identity and concentration	E	Page9,line8
Buffer/kit identity and manufacturer	E	Page9,line8
Exact chemical constitution of the buffer	D	NA
Additives (SYBR Green I, DMSO, etc.)	E	Page9,line8
Manufacturer of plates/tubes and catalog number	D	NA
Complete thermocycling parameters	E	Page9,line9
Reaction setup (manual/robotic)	D	NA
Manufacturer of qPCR instrument	E	Page9,line9
qPCR VALIDATION
Evidence of optimisation (from gradients)	D	NA
Specificity (gel, sequence, melt, or digest)	E	Page8,line16
For SYBR Green I, Cq of the NTC	E	Page8,line16
Standard curves with slope and y-intercept	E	Page8,line16
PCR efficiency calculated from slope	E	Page8,line16
Confidence interval for PCR efficiency or standard error	D	NA
r2 of standard curve	E	Page8,line16
Linear dynamic range	E	Page8,line16
Cq variation at lower limit	E	Page8,line16
Confidence intervals throughout range	D	NA
Evidence for limit of detection	E	Page8,line16
If multiplex, efficiency and LOD of each assay.	E	Page8,line16
DATA ANALYSIS
qPCR analysis program (source, version)	E	Page9,line9
Cq method determination	E	Page9,line9
Outlier identification and disposition	E	Page9,line9
Results of NTCs	E	Page9,line9
Justification of number and choice of reference genes	E	Page9,line9
Description of normalisation method	E	Page9,line9
Number and concordance of biological replicates	D	NA
Number and stage (RT or qPCR) of technical replicates	E	Page9,line9
Repeatability (intra-assay variation)	E	Page9,line9
Reproducibility (inter-assay variation, %CV)	D	NA
Power analysis	D	NA
Statistical methods for result significance	E	Page9,line9
Software (source, version)	E	Page9,line9
Cq or raw data submission using RDML	D	NA
Table 1. MIQE checklist for authors, reviewers and editors. All essential information (E) must be submitted with the manuscript. Desirable
information (D) should be submitted if available. If using primers obtained from RTPrimerDB, information on qPCR target, oligonucleotides,
protocols and validation is available from that source.
*: Assessing the absence of DNA using a no RT assay is essential when first extracting RNA. Once the sample has been validated as
RDNA-free, inclusion of a no-RT control is desirable, but no longer essential.
**: Disclosure of the probe sequence is highly desirable and strongly encouraged. However, since not all commercial pre-designed assay
vendors provide this information, it cannot be an essential requirement. Use of such assays is advised against.
